# Supplementary material for: The Feasibility of Cervical Elastography in Predicting Preterm Delivery in Singleton Pregnancy with Short Cervix Following Progesterone Treatment
Source: PubMed Central journal article supplement (PMC7922916; doi:10.3390/ijerph18042026), 2021-02-19
Supplement: ijerph-18-02026-s001.pdf [file ijerph-18-02026-s001.pdf]

Supplementary Materials

**Table S1.** Comparison of cervical length and elastographic parameters measured at pre- and post-progesterone treatment.

| variable        | Total               |                     |                 | Control             |                     |                 | sPTD                |                     |                 |
|-----------------|---------------------|---------------------|-----------------|---------------------|---------------------|-----------------|---------------------|---------------------|-----------------|
|                 | PP0<br>(n = 114)    | PP1<br>(n = 97)     | <i>p</i> -value | PP0<br>(n = 106)    | PP1<br>(n = 91)     | <i>p</i> -value | PP0<br>(n = 9)      | PP1<br>(n = 6)      | <i>p</i> -value |
| IOS             | 0.21 (0.17–0.28)    | 0.22 (0.17–0.29)    | 0.469           | 0.20 (0.17–0.27)    | 0.21 (0.17–0.28)    | 0.468           | 0.28 (0.25–0.34)    | 0.34 (0.30–0.40)    | 0.409           |
| EOS             | 0.25 (0.20–0.34)    | 0.26 (0.22–0.33)    | 0.612           | 0.24 (0.19–0.34)    | 0.25 (0.21–0.32)    | 0.601           | 0.29 (0.28–0.38)    | 0.33 (0.29–0.40)    | 0.553           |
| ECI             | 3.16 (2.45–,3.93)   | 3.03 (2.37–3.97)    | 0.750           | 3.13 (2.21–3.87)    | 2.98 (2.34–3.93)    | 0.723           | 3.62 (2.90–4.47)    | 4.10 (3.92–4.22)    | 0.776           |
| HR              | 73.65 (62.39–82.79) | 73.19 (63.55–84.25) | 0.696           | 78.28 (62.43–83.48) | 74.41 (65.77–84.59) | 0.708           | 68.44 (53.76–70.39) | 56.30 (41.34–64.19) | 0.272           |
| Cervical length | 22.00 (20.05–24.00) | 24.00 (21.00–26.00) | <0.001          | 22.00 (20.42–24.00) | 24.00 (21.00–26.00) | <0.001          | 20.50 (13.90–23.25) | 24.00 (20.70–27.83) | 0.300           |

ECI, elasticity contrast index; EOS, mean of external os strain; HR, hardness ratio; IOS, mean of internal os strain; PP0, baseline; PP1, post-treatment 1 week. Data are presented as the median (range).
